1 **Reward-dependent selection of feedback gains**

2 **impacts rapid motor decisions**

3 **Abbreviated title: Competition between movement vigor and flexibility**

4

5 Antoine De Comite, Frédéric Crevecoeur, and Philippe Lefèvre

6 *Institute of Information and Communication Technologies, Electronics and*  
7 *Applied Mathematics (ICTEAM), Institute of Neuroscience (IoNS), Université*  
8 *catholique de Louvain, Belgium*

9 ADC, FC and PL designed the study, analysed the data and drafted the  
10 manuscript, ADC collected the data

11 **Corresponding author : Philippe Lefèvre,**

12 *4 Avenue Georges Lemaître, 1348 Louvain-la-Neuve, Belgium*

13 Mail : [philippe.lefevre@uclouvain.be](mailto:philippe.lefevre@uclouvain.be)

14 Phone : +32 10 47 23 82

15 Number of figures : 6

## 16 **Abstract**

17 Expected reward is known to affect planning strategies through modulation of movement vigor.  
18 Strikingly, although current theories suggest that movement planning consists in selecting a goal-  
19 directed control policy, the influence of reward on feedback control strategies remains unknown.  
20 Here we investigated this question in three human reaching experiments. First, we varied the explicit  
21 reward associated with the goal target and found an overall increase in movement vigor for higher  
22 reward targets, highlighted by larger velocities, feedback responses to external loads, and  
23 background muscle activity. Then, assuming that larger feedback gains were used to reject  
24 perturbations, we sought to investigate whether this effect hindered online decisions to switch to a  
25 new target in the presence of multiple successful goals. We indeed observed idiosyncratic switching  
26 strategies dependent on both target rewards and movement vigor, such that the more vigorous  
27 movements were less likely to switch to a new goal following perturbations. To gain further insight  
28 into a causal influence of movement vigor on rapid motor decisions, we demonstrated that biasing  
29 the baseline activity and reflex gains by means of a background load evoked a larger proportion of  
30 target switches in the direction opposite to the background load associated with lower muscle  
31 activity. Our results highlight the competition between movement vigor and flexibility to switch  
32 target during movement.

## 33 **Significance statement**

34 Humans can modulate their movement vigor based on the expected reward. However, a potential  
35 influence of reward on feedback control has not been documented. Here we investigated reaching  
36 control strategies in different contexts associated with explicit rewards for one or multiple goals,  
37 while exposed to external perturbations. We report two strategies: reward could either invigorate  
38 feedback gains, or promote flexible switches between goals. The engagement of peripheral circuits in  
39 the modulation of feedback gains was confirmed by the application of a background load that biased  
40 feedback vigor directionally, which evoked differences in switching behavior in the opposite  
41 direction. We conclude that feedback vigor and flexible changes in goal are two competing  
42 mechanisms to be selected when one interacts with a dynamic environment.

## 43 **Introduction**

44 From the toddler picking their favorite toys to the footballer selecting the best path through  
45 opponents, humans manifest the exquisite ability to plan movements. Movement planning integrates  
46 many factors related to the task goal and to the environment. Amongst them, the reward associated  
47 with the task influences movement planning. Indeed, past studies have reported an increase in  
48 movement vigor associated with increasing reward in saccadic eye movements (Manohar et al.,  
49 2015, 2017) and upper limb reaching movements (Esteves et al., 2016; Summerside et al., 2018). It  
50 was also reported that the selection of the best alternative between different options was biased  
51 toward movements associated with the highest reward (Trommershäuser et al., 2003, 2008).  
52 Similarly, when humans have to select a target, their choices are biased by parameters such as the  
53 biomechanical costs incurred when reaching to each potential option, resulting in target selection  
54 toward less effortful movements (Cos et al., 2011; Morel et al., 2017). Therefore, the commitment to  
55 an action results from a distributed consensus between low level sensorimotor representations of  
56 movement costs and higher level cognitive representations of their outcomes (Cisek, 2007, 2012;  
57 Gold & Shadlen, 2007).

58 Here we tested this theory in a dynamical context by probing the effect of movement reward on  
59 movement execution and online motor decisions. Indeed, recent studies have sought to investigate  
60 whether and how much the factors that characterize action selection during movement planning  
61 could also influence movement execution when the hand has already started moving. A first body of  
62 work has shown that dynamical changes in target selection can be triggered by mechanical (Nashed  
63 et al., 2014) or visual (Kurtzer et al., 2020; Michalski et al., 2020) perturbations occurring during

64 movement. More recently, a study investigated whether cognitive factors, such as the reward  
65 associated with the different options, also influenced online motor decisions when a mechanical  
66 perturbation was applied (Cos et al., 2021). They revealed that the reward distribution across the  
67 potential options influences these decisions and suggested that there could be a link between the  
68 state of the limb at perturbation onset and the outcome of the decision.

69 In the present work, we addressed the relationship between feedback control and online motor  
70 decisions by applying perturbations while participants performed reaching movements toward one  
71 or several targets that differed explicitly by their associated rewards.

72 We first reproduced previous findings of reward-related increase in velocity toward the target.  
73 Importantly, we uncovered that this modulation was associated with an increase in feedback gains  
74 and muscle activity. In a second experiment, we found out that this overall increase in movement  
75 vigor was indeed in competition with the potential selection of a new target. Our third experiment  
76 confirmed that biases in feedback gains induced experimentally were negatively correlated with the  
77 ability to switch goal during movement. Our findings demonstrate that the increase in movement  
78 vigor associated with reward was detrimental to the flexible ability to switch target during  
79 movement. They also demonstrate a dynamic interaction between sensorimotor and cognitive  
80 factors, which influences not only target selection but also the way we respond to perturbations.

## 81 **Methods**

### 82 *Participants*

83 A total of 53 participants were enrolled in this study and took part to one of the three experiments.  
84 The first group performed Experiment 1 and included 14 right-handed participants (7 females)  
85 ranging in age from 21 to 27. The second group performed Experiment 2 and included 20 right-  
86 handed participants (14 females) ranging in age from 20 to 46. The last group performed Experiment  
87 3 and included 19 right-handed participants (11 females) ranging in age from 18 to 52. Participants  
88 were naïve to the purpose of the experiments and had no known neurological disorder. The ethics  
89 committee of the Université catholique de Louvain (UCLouvain) approved the experimental  
90 procedures.

### 91 *Experiments*

92 For the three experiments, participants sat on an adjustable chair in front of a Kinarm end-point  
93 robotic device (KINARM, Kingston, ON, Canada) and grasped the handle of the right robotic arm with  
94 their right hand. The robotic arm allowed movements in the horizontal plane and direct vision of  
95 both the hand and the robotic arm was blocked. Participants were seated such that at rest their  
96 elbow formed an angle of approximately 90° pointed downward and their forehead rested on a soft  
97 cushion attached to the frame of the setup. A virtual reality display placed above the handle allowed

98 the participants to interact with virtual targets. A white dot of 0.5 cm radius corresponding to the  
 99 position of the handle was shown on this display during the whole experiment.

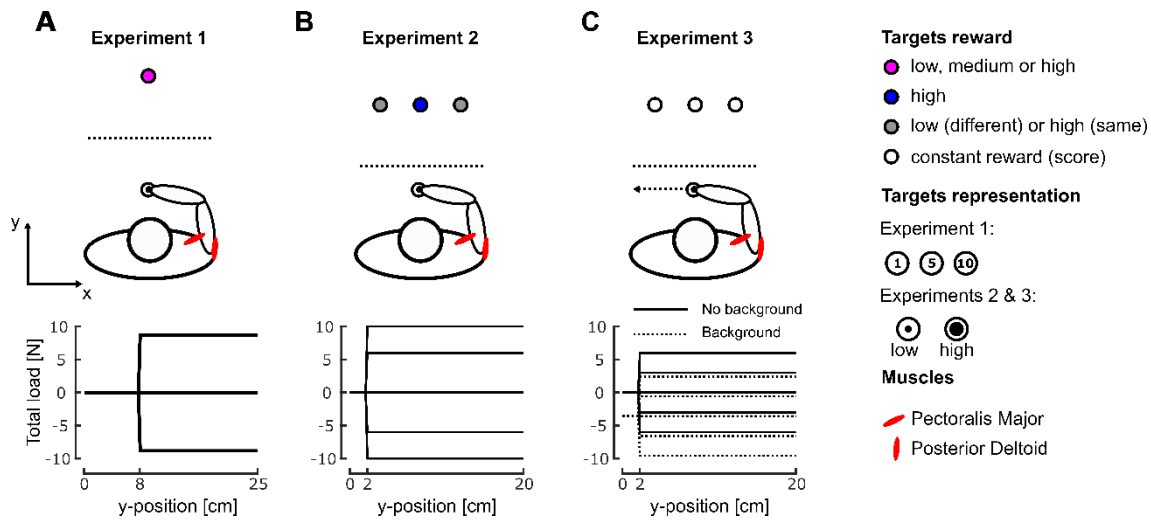

100

101 *Figure 1 : Task paradigms – A Representation of the task paradigm of Experiment 1. Participants controlled a hand-aligned*  
 102 *cursor represented by the black dot on a virtual reality display. They had to reach for the goal target, represented by the*  
 103 *purple goal target in front of them. This goal target could have a low, medium or high reward (1, 5 or 10 points). The bottom*  
 104 *part of the panel represents the load profiles that participants could experience. B Representation of the task paradigm of*  
 105 *Experiment 2. Participants had to reach for any of the three targets presented in front of them. The central target always*  
 106 *had a high reward whereas the two others either had a low or a high reward. The bottom part of the panel represents the*  
 107 *perturbation load that participants could encounter during movements. C Representation of the task paradigm of*  
 108 *Experiment 3. Participants had to reach for any of the three targets presented in front of them. During the second half of the*  
 109 *trials a background load force directed leftward was applied prior and during the movement (dashed line bottom panel). The*  
 110 *bottom part of the panel represents the possible profiles of the total load forces (perturbation load + background load). EMG*  
 111 *data from Pectoralis Major and Posterior Deltoid were collected during all Experiments.*

### 112 Experiment 1

113 In Experiment 1 (Figure 1A top), participants (N=14) were instructed to perform reaching movements  
 114 to a small circular goal target (1.5 cm radius) located at 25 cm in the y-direction from the home  
 115 target, a red disk of 1.5 cm radius. Participants had first to put the hand-aligned cursor in the home  
 116 target, which turned green as they reached it. After a random time delay (anywhere from 1 to 2s),  
 117 the goal target appeared as a red disk containing a number (1, 5 or 10) that corresponded to the  
 118 reward participants would receive if they reached and stabilised within the target for a prescribed  
 119 time window. Reaction time was not constrained and participants could start the movement  
 120 whenever they wanted. Following the exit of the home target, participants had up to 600ms to reach  
 121 the goal target and keep the cursor inside for at least 500ms. The goal target turned green at the end  
 122 of successful trials, or remained red otherwise. During movements, a mechanical perturbation load  
 123 could be applied to participants' hand (33 % of the trials). This load consisted of a lateral step force of  
 124  $\pm 9$  N, with a 10ms linear build-up, aligned with the x-axis. This force was triggered when the hand-  
 125 aligned cursor crossed a virtual line located at 8 cm from the center of the home target (Figure 1A  
 126 bottom). Unperturbed and perturbed trials as well as trials with different rewards were randomly  
 127 interleaved such that participants could not predict the occurrence or the direction of the  
 128 perturbations. Participants started with a 27-trials training block in order to become familiar with the  
 129 task and the force intensity of perturbation loads. After completing this training block, they  
 130 performed 6 blocks of 72 trials. Each 72-trials block included: 48 unperturbed trials (16 with each  
 131 target reward) and 24 trials which contained mechanical perturbations (leftward or rightward, 8 of  
 132 each reward condition). Participants performed a total of 432 trials, including 24 for each perturbed  
 133 condition (direction of the mechanical perturbation and value of the target reward). A total score  
 134 corresponding to the cumulative sum of individual movement rewards was projected next to the goal  
 135 target. Participants were compensated for their participation according to a conversion of this total

136 score. This conversion was calculated such that each participant received between 10 and 15 € as an  
137 incentive to score a maximum number of points during the experiment.

### 138 *Experiment 2*

139 Experiment 2 was designed to assess the effect of reward on online motor decisions. Instead of  
140 reaching to a single target, participants (n=20) were instructed to perform reaching movements to  
141 any of three circular targets (1.5 cm radius) located at 20 cm in the y-direction from the same home  
142 target as in Experiment 1 (Figure 1B top). As in Experiment 1, the goal targets appeared after  
143 participants stabilised the hand-aligned cursor in the home target. All three goal targets appeared in  
144 each trial, the central one being aligned along the y-axis with the home target and the other two  
145 equidistant from this central target at 9 cm along the x-axis. These targets were presented as an  
146 inner disk of radius 0.7 or 1.2 cm inside an outer circle of radius 1.5 cm. The purpose of the inner disk  
147 was to show the reward associated with the target: the larger the diameter of this disk, the higher  
148 the reward. There were two different conditions of reward: either all the targets had the same large  
149 reward (*same values* condition) or only the central target had a large reward while the other two had  
150 smaller rewards (*different values* condition). In a pilot study, we considered a third reward  
151 configuration: the central target had a small reward while the other two had larger rewards. We  
152 observed that, in this third configuration, the behavior in the absence of perturbation load was  
153 biased toward the lateral targets. We therefore decided to exclude this condition to keep the  
154 conditions in which participants spontaneously reached for the center target for the largest  
155 proportion of trials in the absence of any perturbation load. After a random time delay (anywhere  
156 between 1.5 and 3s), the inner disks of the goal targets turned white and participants had to reach  
157 any of these within 400ms to 1000ms to pass the trial. The trial was successfully completed if  
158 participants reached any goal target in the prescribed time window and stabilised the cursor in it for  
159 500ms. The inner disks of the goal targets turned green if the trial was successful and red otherwise.  
160 As in Experiment 1, a mechanical perturbation load could be applied to participant's hand (50 % of  
161 the trials,  $\pm 6$  N or  $\pm 10$  N, 10 ms build-up aligned with the x-axis Figure 1B bottom). This perturbation  
162 was triggered when the hand-aligned cursor crossed a virtual line located at 2 cm from the home  
163 target. Unperturbed and perturbed trials as well as trials with different reward distributions and  
164 force intensities were randomly interleaved. Participants started with a 58-trials training block  
165 followed by 6 blocks of 80 trials. Each 80-trials block included: 40 unperturbed trials and 40 trials  
166 which contained mechanical perturbations. Participants performed a total of 480 trials including 30  
167 trials of each perturbation condition (reward condition and mechanical perturbation condition).  
168 Participants were compensated for their participation using the same conversion rule as in  
169 Experiment 1.

### 170 *Experiment 3*

171 The third experiment was a variant of Experiment 2 and was designed to test the possible impact of  
172 muscle activity on online motor decisions by applying a background force laterally to the reach path  
173 (Figure 1C top). Participants had to perform reaching movements to any of the three targets, located  
174 as in Experiment 2. These targets were identical to the large reward target of Experiment 2 and the  
175 time course of events in the trial was similar as well except that a leftward background mechanical  
176 load of 4N was applied as volunteers reached the home target and remained on throughout the  
177 trials. As in the Experiment 2, a mechanical perturbation load could be applied to participant's hand  
178 during movement (33% of the trials). This load consisted of a  $\pm 3$  N or  $\pm 6$  N with a 10ms build-up  
179 triggered when the hand-aligned cursor crossed a line located at 2 cm from the home target (Figure  
180 1C bottom) and was added to the background load. Participants first performed a 21-trials training  
181 block which did not involve background load. After completing this training, participants performed 4  
182 blocks of 60 trials which did not include the background load. Each 60-trials block included 40  
183 unperturbed trials and 20 trials with mechanical perturbations. After these 60-trials blocks,

184 participants performed a second 21-trials training block which included the background load. Once  
185 this second training block was completed, participants performed a second set of 4 blocks of 60 trials  
186 which included the background load. They thus performed a total of 480 trials amongst which 24 of  
187 each condition (with different perturbation loads and background load on or off). To motivate  
188 participants, a score corresponding to their number of successful trials was projected next to the goal  
189 targets. Participants were compensated a fixed amount for their participation.

#### 190 *Data collection and analysis*

191 Raw kinematics data was sampled at 1kHz and low-pass filtered using a 4<sup>th</sup> order double-pass  
192 Butterworth filter with cut-off frequency of 20 Hz. Hand velocity along the y-axis was computed from  
193 numerical differentiation of the position data using a 4<sup>th</sup> order centered finite difference.

194 Surface EMG electrodes (Bagnoli surface EMG sensor, Delsys INC. Natick, MA, USA) were used to  
195 record muscles activity during movements. We measured the Pectoralis Major (PM) and the  
196 Posterior Deltoid (PD) based on previous studies (Crevecoeur et al., 2019; Lowrey et al., 2017) that  
197 showed that in this configuration they are stretched by the application of forces opposite to their  
198 action, and therefore largely recruited for the feedback responses. Before applying the electrodes,  
199 the skin of the participant was cleaned and abraded with cotton wool and alcohol. Conduction gel  
200 was applied on the electrodes to improve the quality of the signals. The EMG data were sampled at a  
201 frequency of 1kHz and amplified by a factor of 1000. A reference electrode was attached to the right  
202 ankle of the participant. Raw EMG data from the pectoralis major (PM) and posterior deltoid (PD)  
203 were band-pass filtered using a 4<sup>th</sup> order double-pass Butterworth filter (cut-offs: 20 and 250 Hz),  
204 rectified, aligned to force onset and averaged across trials or time windows as specified in the Results  
205 section.

206 EMG data were normalized for each participant to the average activity collected when participants  
207 maintained postural control at the home target against a constant force of 9 N. Data from the  
208 pectoralis major were normalized by the EMG activity in the same muscle while performing postural  
209 control against a rightward force whereas data from the posterior deltoid were normalized by the  
210 EMG activity in the same muscle while performing postural control against a leftward force. This  
211 calibration procedure was applied after the second and the fourth blocks in the first two experiments  
212 and after the first, third, fifth and seventh blocks in the third experiment. Data processing and  
213 parameters extractions were performed using Matlab 2019a.

214 In Experiment 1, we fitted linear mixed models to determine the effect of the target reward on the  
215 kinematics and EMG activity. These models were fitted using the *fitlme* function of Matlab and the  
216 formula used was the following:

$$Parameter = \beta_0 + \beta_1 * Reward + \alpha_i \quad (1)$$

217 The fixed predictors were the intercept ( $\beta_0$ ) and the reward condition ( $\beta_1$ ) while the participants  
218 were included as a random offset ( $\alpha_i$ ). For all linear mixed model analyses that we performed, we  
219 reported the estimate for  $\beta_1$ , the t-statistics for this estimate as well as the corresponding p-value  
220 and the  $r^2$  of the model. One-tailed paired t-tests were used for post-hoc analyses where we  
221 collapsed data across trials and participants to compare the different conditions. Effect size for these  
222 tests were reported using Cohen's d defined as the difference between the means of the two  
223 populations divided by the standard deviation of the whole sample.

224 To analyse the data from Experiments 2 and 3, we designed a multilinear logistic regression model to  
225 infer the effect of reward distribution and background load on target choice as the dependent  
226 variable, respectively. Considering that the dependent variable was a discrete variable (the chosen  
227 target), we use the following logistic regression model:

$$\log\left(\frac{P(\text{Lateral target})}{P(\text{Central target})}\right) = \beta_0 + \beta_1 * \text{Parameter}_1 + \beta_2 * \text{Parameter}_2 \quad (2)$$

228 where the first effect ( $\beta_1$ ) was the reward condition (Experiment 2) or the presence of a background  
229 load (Experiment 3) and the second effect ( $\beta_2$ ) was the intensity of the perturbation load. For these  
230 logistic regressions, we reported the estimates for  $\beta_1$  and  $\beta_2$ , their corresponding t-statistics as well  
231 as their p-value. For post-hoc analyses in Experiment 2, we used a one tailed Wilcoxon signed ranked  
232 test for which we reported the ranksum, the z-statistics when provided, the p-value as well as the  
233 effect size given by the Cohen's d as defined above. In order to investigate the asymmetry in the  
234 parameters  $\beta_1$  obtained in Experiment 3, we used bootstrap resampling on the individual data to  
235 generate 1000 estimates of the  $\beta_1$  parameter for each condition (leftward perturbation versus  
236 rightward perturbation). We then used two samples t-test to compare the bootstrapped distributions  
237 of these two parameters.

238 In order to determine the effect of the background load on the baseline muscle activity in  
239 Experiment 3, we fitted a linear mixed model with interaction terms following this equation:

$$EMG = \beta_1 * \text{Background} + \beta_2 * \text{Muscle} + \beta_{12} * \text{Muscle:Background} + \alpha_i \quad (3)$$

240 Where the first term ( $\beta_1$ ) refers to the background condition, the second ( $\beta_2$ ) to the muscle, the  
241 third one ( $\beta_{12}$ ) to the interaction term and the last one ( $\alpha_i$ ) to the random offset of participants. For  
242 all these  $\beta$ , we reported their estimated value as well as their t-statistics, associated p-value and the  
243  $r^2$  of the model. Significance was considered at the level of  $p=0.05$  even though we decide to exactly  
244 report any p-value that was larger than  $p=0.005$  as previously proposed (Benjamin & Berger, 2018).  
245 In the figures, we reported significant differences for the level  $p=0.05$  (\*),  $p=0.01$ (\*\*) and  
246  $p=0.005$ (\*\*\*).

247

## 248 **Results**

### 249 *Experiment 1 : Influence of the target reward on feedback corrections during movement*

250 To determine whether target reward influences feedback corrections during movement, participants  
251 were instructed to perform reaching movements to a goal target associated with a reward that could  
252 change across trials (see Methods). During movements, mechanical perturbation loads could be  
253 applied to reveal feedback corrections. The occurrence of feedback corrections was assessed by  
254 looking at movement kinematics and EMG responses of the muscles stretched by the perturbations.

255 The mean hand path trajectories across participants are represented in Figure 2A for the different  
256 perturbations and reward conditions. Consistent with previous work (Shadmehr et al., 2016;  
257 Summerside et al., 2018) we observed a significant increase in forward peak velocity with increasing  
258 reward values. Figure 2B shows the differences in the forward velocities between the high (dash-dot  
259 lines) or medium (full lines) and low reward conditions unperturbed (top) and perturbed (bottom)  
260 trials. The peak forward velocity increased with increasing reward value both for unperturbed (Figure  
261 2D top, linear mixed model:  $\beta_1=0.013$ ,  $t=6.51$ ,  $p<0.005$ ,  $r^2=0.76$ ) and perturbed (Figure 2D bottom,  
262 linear mixed model, right:  $\beta_1=0.014$ ,  $t=3.76$ ,  $p<0.005$ ,  $r^2=0.78$ , left:  $\beta_1=0.018$ ,  $t=4.68$ ,  $p<0.005$ ,  
263  $r^2=0.79$ ) trials. Post-hoc comparisons between low and high reward conditions revealed a significant  
264 increase of peak velocity with reward for all perturbation conditions (one-tailed paired t-tests,

265 unperturbed:  $t=-7.48$ ,  $p<0.005$ ,  $d=0.12$ , left:  $t=-5.37$ ,  $p<0.005$ ,  $d=0.16$  and right:  $t=-3.99$ ,  $p<0.005$ ,  
 266  $d=0.13$ ).

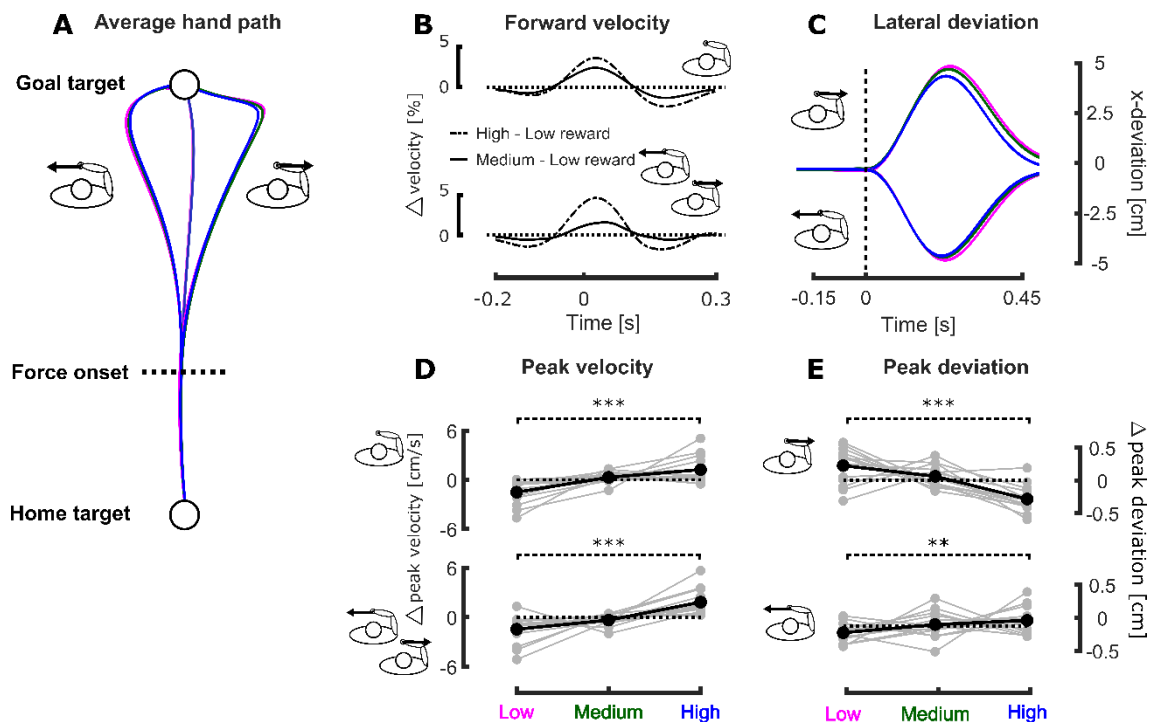

267

268 *Figure 2: Experiment 1, kinematics – A Mean hand path across participants for the different conditions of the first*  
 269 *experiment. The purple, green and blue traces respectively correspond to the low, medium and high reward conditions. The*  
 270 *dashed line represents the onset of the mechanical perturbation. B Mean difference in forward velocity between the high*  
 271 *and low (dash-dot line) and medium and low (full line) for the unperturbed (top) and perturbed (bottom) trials. The time axis*  
 272 *is aligned on the force onset. C Mean hand deviation across participants for the perturbed trials. The hand deviation has*  
 273 *been obtained by subtracting the mean hand path to the perturbed hand path in the same reward condition for every*  
 274 *subjects. The top part of the graph represents the trials perturbed to the right whereas the bottom part of the graph*  
 275 *represents the trials perturbed to the left. D Group mean (black) and individual means (grey) of the differential forward peak*  
 276 *velocity for the unperturbed trials (top) and perturbed trials (bottom) as a function of the reward condition with respect to*  
 277 *average forward peak velocity. E Group mean (black) and individual means (grey) of the difference in hand deviation with*  
 278 *respect to the mean hand deviation for leftward (top) and rightward (bottom) perturbation in the three reward conditions*  
 279 *with respect to the average hand deviation.*

280

281 The effect of the mechanical perturbation on the movement kinematics was also dependent on the  
 282 reward value. Indeed, the lateral hand deviation induced by the mechanical perturbation (Figure 2C),  
 283 computed as the difference between the hand paths in the perturbed conditions and the mean hand  
 284 path in the corresponding unperturbed reward condition for each participant, depended significantly  
 285 on the reward condition. For both perturbation directions (Figure 2E top for leftward and bottom for  
 286 rightward perturbations), we observed a significant decrease in the maximal hand deviation along  
 287 the x-axis with increasing reward value (linear mixed models, right:  $\beta_1=-0.0025$ ,  $t=-4.98$ ,  $p<0.005$ ,  
 288  $r^2=0.38$  and left:  $\beta_1=-0.0009$ ,  $t=-2.25$ ,  $p=0.024$ ,  $r^2=0.35$ ). Post-hoc comparisons between low and  
 289 high reward conditions revealed a significant decrease for both perturbation directions (one-tailed  
 290 paired t-tests, right:  $t=5.31$ ,  $p<0.005$ ,  $d=0.14$  and left:  $t=2.34$ ,  $p=0.009$ ,  $d=0.3$ ).

291 Based on these kinematics analyses and previous studies showing that faster movements and smaller  
 292 hand deviations induced by perturbations are correlated with high EMG activity (Crevecoeur et al.,  
 293 2019) we hypothesised that the EMG activity in PM and PD during movement scaled with increasing



294 reward. We investigated this effect both for baseline activity measured during unperturbed trials and  
 295 for feedback responses to perturbation loads.

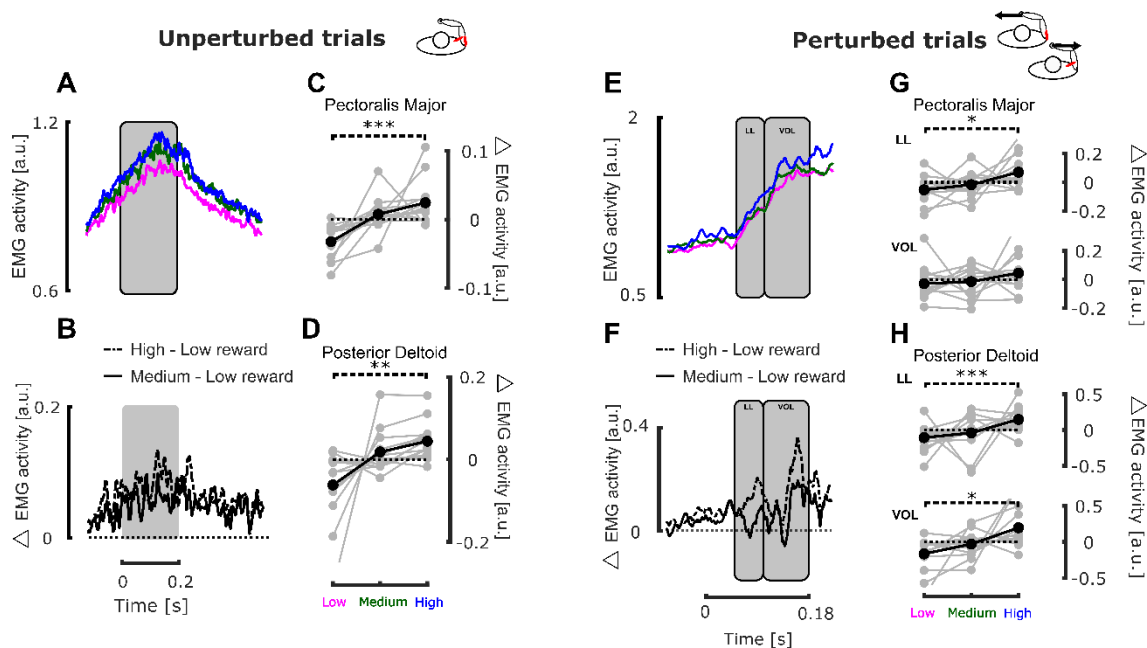

296

297 *Figure 3 : Experiment 1, EMG activity – A Mean EMG activity collapsed across muscles and participants for unperturbed*  
 298 *trials. The time axis is aligned on force onset. B Mean differences in EMG activity collapsed across muscles and participants*  
 299 *between high and low (dash-dot line) and medium and low (full line) reward conditions for unperturbed trials. C Group mean*  
 300 *(black) and individual means (grey) Pectoralis Major EMG activity binned between 0 and 200 ms after force onset for*  
 301 *unperturbed trials. D Group mean (black) and individual means (grey) Posterior Deltoid EMG activity binned between 0 and*  
 302 *200 ms after force onset for unperturbed trials. E Mean EMG activity collapsed across muscles and participants while*  
 303 *responding to perturbations. Only the activities of the agonist muscles (ie. PM for rightward perturbation and PD for*  
 304 *leftward perturbation) were used. F Mean differences in EMG activity collapsed across muscles and participants between*  
 305 *high and low (dash-dot line) and medium and low (full line) reward conditions for agonist muscles in presence of*  
 306 *perturbation load. G Group mean (black) and individual means (grey) differential EMG activity in PM binned in the long*  
 307 *latency (50-100 ms, top) and voluntary epochs (100-180 ms, bottom) as a function of the reward condition. H Group mean*  
 308 *(black) and individual means (grey) of the differential EMG activity in PD binned in the long latency (50-100 ms, top) and*  
 309 *voluntary epochs (100-180 ms, bottom) as a function of the reward condition.*

310

311 We observed a positive relationship between the EMG activity during unperturbed trials and the  
 312 value of the target reward. Figure 3A represents the mean EMG activity collapsed across muscles and  
 313 participants for unperturbed trials while the differences between these collapsed EMG activities in  
 314 the high (dash-dot line) or medium (full line) and the low reward condition are represented in Figure  
 315 3B. We binned the EMG activity of each trial in a time bin ranging from 0 to 200 ms after  
 316 perturbation onset (gray rectangle in Figure 3A and 3B) and fitted a linear mixed model (see  
 317 Methods) on these binned values to determine whether reward had an influence on the EMG activity  
 318 (deviations from the mean binned EMG activity in the different reward conditions are represented in  
 319 Figure 3C and 3D for PM and PD respectively). We observed an increase in EMG activity with the  
 320 reward in both muscles (PM:  $\beta_1=0.028$ ,  $t=4.603$ ,  $p<0.005$ ,  $r^2 = 0.68$ , PD:  $\beta_1 = 0.053$ ,  $t=5.98$ ,  $p<0.005$ ,  
 321  $r^2=0.66$ ). Post-hoc analyses performed on individual data showed that EMG activity was larger in the  
 322 high reward condition than in the small one for both muscles (one-tailed paired t-tests: pectoralis,  
 323  $t=4.14$ ,  $p<0.005$ ,  $d=0.118$  and deltoid,  $t=2.92$ ,  $p=0.0059$ ,  $d=0.1653$ ).

324 The EMG response to mechanical perturbation in the agonist muscles was also modulated by the  
 325 reward value. Indeed, linear mixed model analyses performed on the responses measured in PM and  
 326 PD, when respectively a rightward or leftward perturbation occurred, showed a significant increase  
 327 of EMG activity with increasing reward in the long-latency epochs (50-100 ms). We reported the EMG

328 activities collapsed across muscles and participants in Figure 3E as well as the difference in these  
329 activities between the high (dash-dot line) or medium (full line) and the low reward condition in  
330 Figure 3F. For each perturbation direction, we binned the EMG activity of the stretched muscle in the  
331 long latency (LL 50-100 ms after force onset) and voluntary (VOL 100-180 ms after force onset)  
332 epochs. Figure 3G and 3H respectively represent the deviation from the mean binned EMG activity in  
333 these two time bins (LL top and VOL bottom) for PM and PD in the different reward conditions. In PM  
334 we observed a significant increase in the LL window (mixed model:  $\beta_1=0.0615$ ,  $t=2.89$ ,  $p<0.005$ ,  
335  $r^2=0.64$ ) but even though a positive tendency emerged in the VOL window, no significant increase  
336 was observed (mixed model:  $\beta_1=0.036$ ,  $t=1.616$ ,  $p=0.106$ ,  $r^2=0.69$ ). Individual pairwise post-hoc  
337 comparisons between low and high conditions confirmed these findings (one-tailed paired t-tests: LL,  
338  $t=-2.48$ ,  $p=0.0137$ ,  $d=0.1592$  and Vol,  $t=-1.18$ ,  $p=0.128$ ,  $d=0.08$ ). The same holds for PD in which we  
339 found a significant increase of EMG activity in LL window with the reward (mixed model:  $\beta_1=0.216$ ,  
340  $t=2.12$ ,  $p=0.034$ ,  $r^2=0.63$ ) but no significant effect in the VOL window (mixed model:  $\beta_1=0.181$ ,  
341  $t=1.887$ ,  $p=0.059$ ,  $r^2=0.77$ ). In this case however, the individual pairwise comparisons between low  
342 and high conditions revealed a significant increase in both time windows (one-tailed paired t-tests:  
343 LL,  $t=-3.68$ ,  $p<0.005$ ,  $d=0.11$  and VOL,  $t=-2.57$ ,  $p<0.01$ ,  $d=0.07$ ).

344 Therefore, the results of Experiment 1 revealed that the value of the target reward influenced both  
345 the movement kinematics and the EMG activity recorded during movement. Indeed, we showed that  
346 the hand deviation induced by mechanical perturbations decreased with increasing reward value for  
347 both rightward and leftward perturbations. Moreover, the forward peak velocity of reaching  
348 movement increased with increasing reward value. Finally, EMG activity in both PM and PD increased  
349 with increasing reward value for unperturbed trials and in the long-latency response window for  
350 perturbed movement when the muscles were stretched by the perturbation. The modulation of  
351 forward hand velocity and baseline EMG activity which also produced increases in feedback  
352 responses to perturbation loads is consistent with an increase in control gains previously observed in  
353 uncertain dynamical contexts and interpreted as a robust control strategy (Crevecoeur et al., 2019).

#### 354 *Experiment 2: Influence of the reward of the different options on online motor decisions*

355 In Experiment 1, we showed that reward of the goal target has an influence on the way humans  
356 perform reaching movements to this target similarly to other task parameters such as target shape,  
357 presence of obstacles, etc. Moreover, previous studies have shown that these task parameters that  
358 modify the control strategies could also influence online motor decisions (Nashed et al., 2014). We  
359 therefore designed a second experiment to determine whether reward could also influence online  
360 motor decisions. In this second experiment, participants had to reach to any of three potential  
361 targets aligned orthogonally to the main reaching direction (see Methods). The central target always  
362 had a large reward while the two lateral targets could either have lower reward or a reward equal to  
363 that of the central target. We assessed the effect of the difference between central and lateral  
364 rewards on online motor decisions by investigating the frequencies of reaching for the lateral targets.  
365 Mechanical perturbations that could occur during movement were used to evoke changes in goal  
366 target. Because perturbations were unpredictable, a change in reaching frequency for the lateral  
367 targets dependent on the perturbation load was indicative of a perturbation-mediated change in goal  
368 that occurred during movement. The biomechanical and EMG states at perturbation onset in the

369 same condition were also investigated to determine whether they had an influence on the future  
 370 decision.

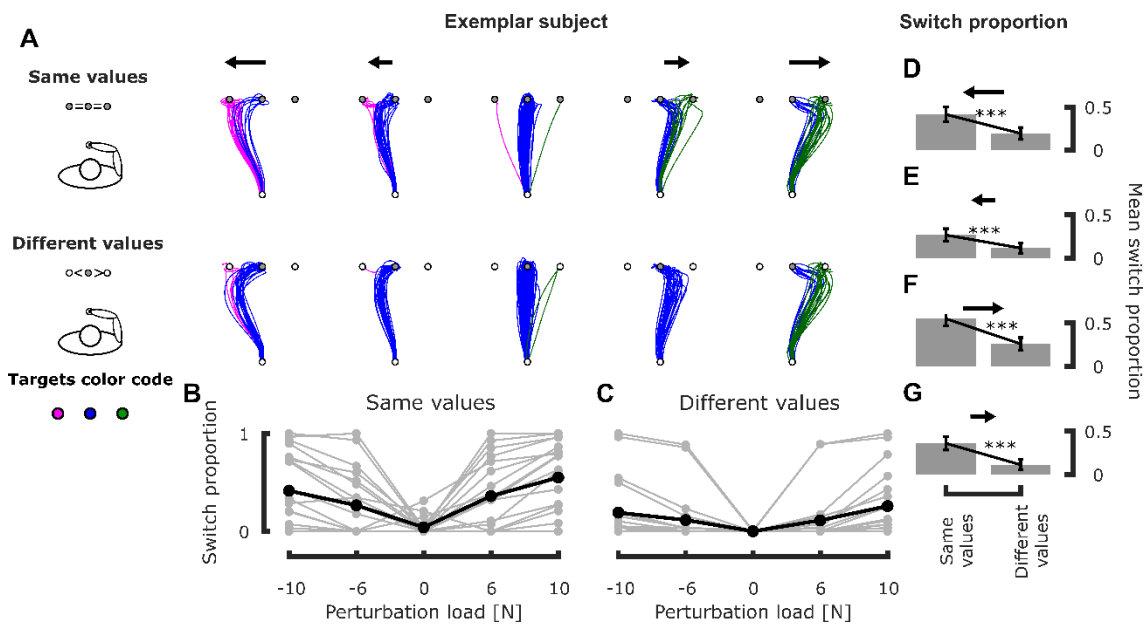

371

372 *Figure 4 : Experiment 2, Kinematics – A* Representation of hand path of individual trials for a representative subject in the  
 373 same condition on top (all the targets had the same reward) and in the different condition on bottom (the central target had  
 374 a higher reward than the other two). The different columns represent the different force levels (from right to left, large  
 375 leftward perturbation to large rightward perturbation). Magenta, blue and green paths respectively represent the paths  
 376 that reached the left, central and right targets. **B** Group mean (black) and individual means (grey) of the switch proportion  
 377 (i.e. fraction of trials that reached either the left or right targets) as a function of the applied load for the same condition.  
 378 **C** Group mean (black) and individual means (grey) of the switch proportion (i.e. fraction of trials that reached either the left or  
 379 right targets) as a function of the applied load for the different condition. **D-G** Comparison of the switch proportion for the  
 380 same (left) and different (right) conditions for the trials with large leftward force, small leftward force, small rightward force  
 381 and large rightward force respectively.

382

383 First, we observed that the reward of the lateral targets had a clear effect on the frequency of trials  
 384 that ended on these targets. Figure 4A represents the hand paths of a typical participant toward the  
 385 different targets in various conditions. In general, in the absence of perturbation, subjects tend to  
 386 reach to the central target except for some trials (<1% in the *different values* condition and 8 % in the  
 387 *same values* condition). In all cases, the frequency of lateral target increased with the magnitude of  
 388 the perturbation (top and bottom part of Figure 4A for *same* and *different values* conditions  
 389 respectively). In addition, there was a significant effect of the lateral targets reward on the frequency  
 390 of lateral target reach: lower frequencies for different rewards. In order to determine the significance  
 391 of these effects, we identified for each trial the target that was reached at the end of the movement  
 392 and fitted a multilinear logistic regression on these data to determine whether the reward condition  
 393 and the force had an influence on the target reached (see Methods). We observed a significant effect  
 394 of the reward for both the left ( $\beta_1 = 1.103, t = 10.84, p < 0.005$ ) and right ( $\beta_1 = 1.666, t =$   
 395  $18.45, p < 0.005$ ) targets versus the central one. These positive values indicate that the reach  
 396 proportion to the lateral targets is larger in the same than in the different condition (see Figure 4B  
 397 and 4C for the *same values* and *different values* conditions respectively). The intensity of the  
 398 perturbation loads also had a significant effect for both lateral targets versus the central one (left:  
 399  $\beta_1 = -1.33, t = -26.82, p < 0.005$  and right:  $\beta_1 = 1.25, t = 29.07, p < 0.005$ ). Due to the sign of the force kept in  
 400 the regression model, in both cases the frequency of lateral target reach increased with the force  
 401 magnitude in absolute value. Post-hoc analyses performed at fixed force levels showed significant  
 402 effect of the reward condition on the reaching proportion for all the perturbed conditions. We  
 403 observed a smaller reach proportion to the left target in the *different values* condition compared to

404 the *same values* condition for both perturbation directions (one tailed Wilcoxon signed-rank test:  
 405 ranksum=3,  $p < 0.005$ ,  $d = 0.61$  - see Figure 4D - and ranksum=1,  $p < 0.005$ ,  $d = 0.49$  - see Figure 4E - for  
 406 loads of -10 and -6N respectively). The mirror effect was observed for the right target: a decrease in  
 407 the reach proportion in the *different values* condition for both perturbation directions (one-tailed  
 408 Wilcoxon signed-rank test: ranksum=0,  $p < 0.005$ ,  $d = 0.74$  - see Figure 4F - and ranksum=3,  $p < 0.005$ ,  
 409  $d = 0.78$  - see Figure 4G - for loads of 6 and 10 N respectively).

410 These results showed that participants took the reward distribution of the options offered by the  
 411 three targets into account while deciding which target they should reach. The next question that we  
 412 will address is whether any parameters linked to the current state of the limb could modify the  
 413 decision between the different motor outcomes.

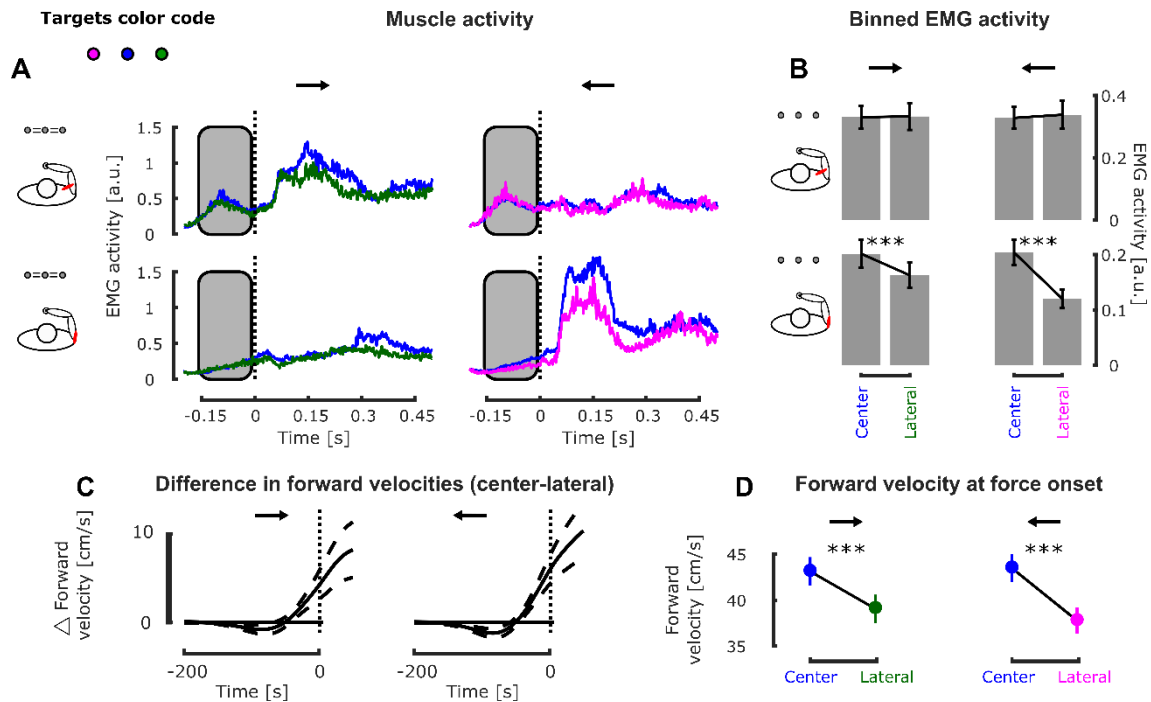

414  
 415 **Figure 5 : Experiment 2, EMG activity-** **A** Mean EMG activity in Pectoralis Major (top) while responding to rightward (first  
 416 column) and leftward perturbations (second column) and in Posterior Deltoid (bottom) while responding to rightward (first  
 417 column) and leftward (second column) perturbations in the second experiment. The magenta, blue and green traces  
 418 represent the mean EMG activity measured when participants reached the left, center or right target respectively. **B** Binned  
 419 EMG activity before force onset in Pectoralis Major (top) and Posterior Deltoid (bottom) for the leftward and rightward  
 420 perturbation loads, for the trials that reached the central (left bin) and lateral (right bin) targets. **C** Group mean and SEM of  
 421 the differences in forward velocities across participants between the center and lateral trials for trials with rightward (left)  
 422 and leftward (right) perturbations. **D** Comparison of the forward velocity at force onset for the trials that reached the central  
 423 (blue) and lateral (green or purple) targets with a rightward or leftward perturbation load.

424

425 Interestingly, we observed some differences in the kinematics and EMG activity before force onset  
 426 between the trials that ended up in the central target and the ones that reached one of the two  
 427 lateral targets. Figure 5A represents the mean EMG activity recorded in PM (top) and PD (bottom) in  
 428 presence of mechanical perturbations (rightward, first column and leftward second column) across  
 429 participants for the different targets (purple: left, blue: center and green: right) in the *same values*  
 430 condition. No significant differences were observed in PM prior to force onset (-150ms to 0 ms, grey  
 431 rectangle in Figure 5A) between the trials that reached the center target and the ones that reached  
 432 the lateral targets (Figure 5B top) for both force directions (left: linear mixed model  $\beta_1 = -0.019$ ,  $t = -$   
 433  $1.76$ ,  $p = 0.0782$ ,  $r^2 = 0.62$  and right: linear mixed model  $\beta_1 = 0.0054$ ,  $t = 0.89$ ,  $p = 0.3758$ ,  $r^2 = 0.64$ ).  
 434 However, we observed an increase in the EMG activity of PD prior to perturbation onset for the trials  
 435 that reached the center target compared to the ones that reached the lateral targets for both force

436 directions (Figure 5B bottom, left: linear mixed model  $\beta_1 = 0.022$ ,  $t=3.78$ ,  $p<0.005$ ,  $r^2=0.68$  and  
437 right:  $\beta_1=-0.051$ ,  $t=-4.804$ ,  $p<0.005$ ,  $r^2=0.60$ ). This increase in EMG activity for trials that ended at the  
438 central target was correlated with larger forward velocities at force onset. We reported in Figure 5C  
439 the differences in forward velocities between the center and the lateral trials for both perturbation  
440 directions. In presence of a leftward perturbation (Figure 5C and D, right panels), we observed a  
441 larger forward velocity at force onset for trials that end up at the center target compared to those  
442 that reached the lateral target (linear mixed model:  $\beta_1=-0.013$ ,  $t=-3.347$ ,  $p<0.005$ ,  $r^2=0.54$ ). The  
443 same holds for trials with rightward perturbations (Figure 5C and D, left panels - linear mixed model:  
444  $\beta_1=0.040$ ,  $t=9.476$ ,  $p<0.005$ ,  $r^2=0.57$ ). Similar observations were reported in the *different values*  
445 conditions. Indeed, we observed an increase in EMG activities in both muscles for the trials that  
446 ended up at the center target compared to those that reached the lateral target (PM linear mixed  
447 model:  $\beta_1=-0.051$ ,  $t=-4.81$ ,  $p<0.005$ ,  $r^2=0.60$  and PD linear mixed model:  $\beta_1=0.022$ ,  $t=3.78$ ,  $p<0.005$ ,  
448  $r^2=0.68$ ). Moreover, some tendencies were observed in the forward speed for trials with rightward  
449 ( $\beta_1=-0.011$ ,  $t=-2.019$ ,  $p=0.0436$ ,  $r^2=0.52$ ) and leftward (linear mixed model  $\beta_1=0.012$ ,  $t=1.95$ ,  
450  $p=0.0505$ ,  $r^2=0.57$ ). These results collected in the *different values* conditions have to be analysed  
451 with caution because of the low number of trials that ended up at one of the two lateral targets  
452 (7.5% in the *different values* and 23.5% in the *same values* condition).

453 We also tested whether the reward condition (ie. *same values* and *different values*) modified  
454 movement vigor by comparing the forward velocities and muscle activities at force onset between  
455 both reward conditions. We did not observe any difference in forward velocities between both  
456 reward conditions at perturbation onset as reported by mixed effect models ( $t=0.60$ ,  $p=0.54$ ,  
457  $r^2=0.03$ ). Similarly, we did not observe any differences in EMG activities averaged during the 50ms  
458 preceding perturbation onset as revealed by mixed model analyses (PM:  $t=-0.3962$ ,  $p=0.69$ ,  $r^2=0.28$   
459 and PD:  $t=0.07$ ,  $p=0.93$ ,  $r^2=0.06$ ). This absence of correlation between the reward condition and  
460 movement vigor was interesting as it confirmed that we did not introduce any experimentally  
461 induced modulation of vigor in our paradigm. The differences in switching frequencies observed  
462 between the *same* and *different values* conditions are therefore attributable to the reward  
463 distribution and to vigor variability within both reward conditions.

464 This second experiment showed that humans take reward into account to respond to perturbations  
465 and potentially change target goal during movement. More specifically, participants will tend to  
466 reduce their frequency of reaching toward targets that have a lower reward. We also showed that  
467 some parameters measured before the perturbation onset are correlated with the target that is  
468 reached at the end of the trial.

### 469 *Experiment 3: Effect of the pre-activation of muscle on the motor decision*

470 An outstanding question is when was the decision made to switch target. Did participants decide to  
471 change after the perturbation, or did they plan to change prior to movement? On the one hand, in  
472 this experiment as in previous reports (Nashed et al., 2014), changes in goal target depend on the  
473 occurrence and magnitude of the force so it is at least partially determined by sensory information  
474 collected during movement. On the other hand, the observation that the switch also depended on  
475 the baseline activity suggests that there could be an influence of the state of the limb from the  
476 beginning of the movement on the decision. We wanted to investigate this possibility in Experiment  
477 3. This experiment was specifically designed to investigate whether the pre-activation of PD prior to  
478 movement onset could bias the frequency of target switches. Participants had to reach any of the  
479 three targets located at the same position as in Experiment 2. All targets had the same reward in this  
480 experiment. During movement, mechanical perturbation loads could push participant's hand  
481 orthogonally to the main reaching decision. During half of the trials, a leftward background load was  
482 applied to participant's hand throughout movement evoking a background activation to counter the

483 background load (see Methods). We assessed the effect of pre-activation of PD by investigating the  
 484 reach proportions to the lateral targets as a function of force intensity and background condition.

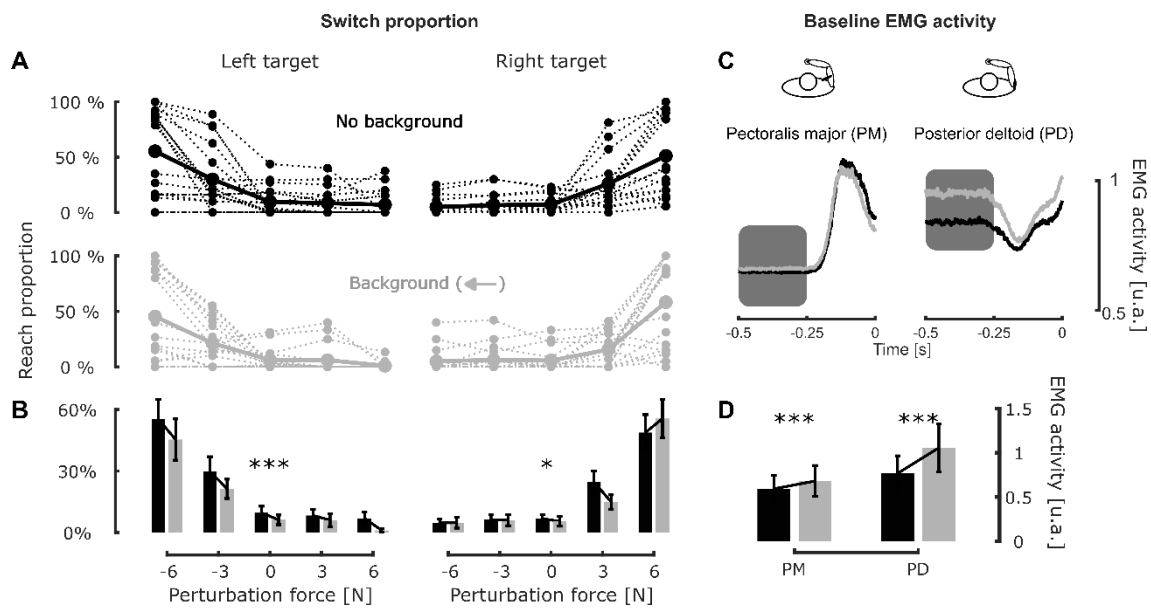

485  
 486 *Figure 6 : Experiment 3 – A* Group mean (full line) and individual means (dashed lines) of the reach proportion to the left and  
 487 right targets for the conditions without (top row, black) and with (bottom row, grey) the leftward background load as a  
 488 function of perturbation load. *B* Comparison of the reach proportion of the left and right targets (left and right columns  
 489 respectively) with (grey boxes) and without (black boxes) the leftward background force. *C* Group mean of the EMG activity  
 490 in Pectoralis Major (left) and Posterior Deltoid (right) prior to movement onset for trials without (black) and with (grey) a  
 491 background load. *D* Comparison of the binned EMG activity between 500 and 300ms (corresponds to the grey box in panel  
 492 C) before force onset in Pectoralis Major and Posterior Deltoid for the conditions with and without background.

493  
 494 The application of a leftward background force induced an increase in both PM and PD baseline EMG  
 495 activity (Figure 6C). We found a significant effect of the background load in both muscles (main effect  
 496 of the linear mixed model on both muscles:  $\beta_1 = -0.11$ ,  $t = -6.73$ ,  $p < 0.005$ ,  $r^2 = 0.91$ ) as represented in  
 497 Figure 6D. Moreover, we also observed an interaction effect between the background load and the  
 498 muscle: baseline activity in PD increased more than PM activity ( $\beta_{12} = 0.20$ ,  $t = 19.067$ ,  $p < 0.005$ ,  
 499  $r^2 = 0.91$ ).

500 We found that the leftward background load modified the reach proportion to the left target for all  
 501 kind of online mechanical loads. Figure 6A represents the reach proportions to the left and right  
 502 targets (respectively left and right column) as a function of the intensity of the perturbation load for  
 503 the trial with (bottom) or without (top) background. In order to show the effect of the background  
 504 load on the reach proportion to the lateral targets, we fitted a multilinear logistic regression (see  
 505 Methods) that inferred the effect of perturbation and background load on the reached target. This  
 506 multilinear logistic regression revealed a significant effect of the background and perturbations loads  
 507 on both the left and right targets reaching proportion. Concerning the perturbation load, we  
 508 observed an increase of the reach proportion to the left target with increasing leftward force ( $\beta_1 = -$   
 509  $0.9223$ ,  $t = -22.16$ ,  $p < 0.005$ ) and the mirror effect for the right target ( $\beta_1 = 1.0204$ ,  $t = 23.86$ ,  $p < 0.005$ ).  
 510 The background load also had a significant effect on the reach proportion for these two targets. The  
 511 reach proportion to the left target decreased when the background load was applied ( $\beta_1 = -0.4611$ ,  $t = -$   
 512  $6.1759$  and  $p < 0.005$ , Figure 6B left panel). Intuitively an increase in force toward a target could bias  
 513 the choice for that target but it was not the case. A slight decrease in reach proportion for the right  
 514 target was also revealed by this regression ( $\beta_1 = -0.1544$ ,  $t = -1.9972$ ,  $p = 0.0458$ , Figure 6B right panel).  
 515 The intensity of this effect on the two lateral targets was compared using bootstrap resampling: this  
 516 effect was larger for the left than for the right target (one tailed t-test:  $t = 92.08$ ,  $p < 0.005$ ,  $d = -1.79$ ).

517 We generated 1000 bootstrap datasets from the original dataset used to fit the multilinear logistic  
518 regression and fitted the multilinear regression on each of these bootstrap datasets. We extracted  
519 bootstrap estimates of the main effect of background on the target reached for both lateral targets.  
520 Normality of the distributions of these bootstrap estimates was assessed using Kolmogorov-Smirnov  
521 tests ( $p < 0.005$  for both targets).

522 Post-hoc analyses performed on the individual reach proportion to lateral targets confirmed this  
523 asymmetry between left and right target (see Figure 6B). We observed a significant decrease of the  
524 individual reach proportion to the left target induced by the background load across participants and  
525 force levels (one tailed Wilcoxon signed-rank test :  $z = 2.83$ ,  $\text{ranksum} = 999.5$ ,  $p < 0.005$ ,  $d = 0.21$ ). No  
526 similar effect was observed for the right target (Wilcoxon signed-rank test:  $z = 1.23$ ,  $\text{ranksum} = 1015$ ,  
527  $p = 0.2154$ ,  $d = 0.03$ ).

528 An interesting question is whether this background force also modulated forward velocity. We  
529 address this question by using a linear mixed model to compare forward speed at force onset in the  
530 conditions with and without background load. No modulation of movement speed between these  
531 conditions was observed (linear mixed model  $\beta_1 = -0.009 \pm 0.007$ ,  $t = -1.2528$ ,  $p = 0.210$ ,  $r^2 = 0.44$ ). This  
532 result is important as it discards the eventuality that the modulation of flexibility to switch to a new  
533 target goal was induced by movement velocity.

534 The results of this last experiment showed that the tendency to switch observed in Experiment 2  
535 depended on the biomechanical state of the limb. Importantly, the application of a background load  
536 in a direction reduces the tendency to switch in this direction in a larger amount than the tendency  
537 to switch in the opposite direction.

## 538 Discussion

539 We conducted three experiments to investigate whether humans favor movement vigor or flexibility  
540 for rapid motor decisions by leveraging the influence of explicit target reward and muscle activity. In  
541 Experiment 1, we demonstrated that target reward did not only increase movement vigor as  
542 reported in previous studies (Summerside et al., 2018; Yoon et al., 2018), but it also increased  
543 feedback gains and muscle activity. We observed that perturbation-related lateral hand deviations  
544 were smaller when they reached for a target associated with larger reward. Moreover, we also  
545 observed an increase in the baseline EMG activity as well as an increase in the EMG response to  
546 perturbation loads with increasing reward. Altogether, these results suggest that the feedback gains  
547 used to perform movements scaled with the value of the reward. We then uncovered that an  
548 increase in feedback gains, whatever the reason, was detrimental to the ability to switch target  
549 during movement. Indeed, we observed in Experiment 2 and 3 that participants were less likely to  
550 switch target during movement in the trials associated with a higher muscle activity. The modulation  
551 in muscle activity introduced experimentally in Experiment 3 induced a directional bias in the ability  
552 to switch target online, showing a causal influence of the state of the peripheral motor system on  
553 one's ability to flexibly switch movement goal.

554 The increase in movement vigor and feedback gains associated with reward that we observed in  
555 Experiment 1 was coherent with the use of a robust control strategy (Bian et al., 2020; Crevecoeur et  
556 al., 2019). A robust controller consists in an alternative to stochastic optimal control (Todorov &  
557 Jordan, 2002) that has the property to consider unmodelled disturbances (Basar & Bernhard, 1991)  
558 which results in better responses to mechanical perturbations during movements (Bian et al., 2020;  
559 Crevecoeur et al., 2019). Reward is known to invigorate movements as revealed in saccadic eye  
560 movements where faster movements were observed toward higher monetary rewards (Manohar et  
561 al., 2015, 2017) or toward targets associated with higher implicit rewards (Xu-Wilson et al., 2009).  
562 Similar observations were made for upper limb reaching movements that exhibited higher peak  
563 velocities toward more rewarding targets (Esteves et al., 2016; Sackaloo et al., 2014; Summerside et  
564 al., 2018; Yoon et al., 2018). This was taken as evidence for reward-dependent selection of

565 movement time (Haith et al., 2012; Shadmehr et al., 2010). Here we postulate that another  
566 mechanism is also at play: a higher reward produced a more robust strategy that revealed  
567 participants' will to render their movements less sensitive to perturbations, thereby reducing the risk  
568 to miss the goal. In this framework the reduction in movement time results from the robustness of  
569 the control that impacts movement velocity through larger goal-feedback gains. A parallel and  
570 complementary argument was recently developed in a study demonstrating that an increase in  
571 internal feedback gains is responsible for reward-related in endpoint accuracy (Manohar et al., 2019).

572 In this framework, the modulation of the robustness of control has a clear limitation that we were  
573 able to establish empirically: a robust control strategy is meant to reject disturbances  
574 indistinguishably, thus in principle it is clear that this strategy is not compatible with a flexible change  
575 in movement goal online, which requires a reduction in feedback response to let the perturbation  
576 redirect one's hand toward the new goal. The competition between robust control and flexible  
577 online decisions was clearly borne out in our results. Indeed, we observed in Experiment 2 a  
578 correlation between higher muscle activities during movement and the reduced probability of  
579 switching to a new goal.

580 Our results revealed a dynamic interaction between sensorimotor and cognitive factors, which  
581 influences not only target selection but also the way we respond to perturbations. Theoretical  
582 models of decision-making between different reach options suggest that the target selection occurs  
583 through a competition between the different options that integrate the motor costs incurred to each  
584 option (Cos et al., 2011; Morel et al., 2017; Shadmehr et al., 2016) as well as their respective  
585 outcome (Trommershäuser et al., 2003, 2008) through a distributed consensus (Cisek, 2007, 2012;  
586 Gold & Shadlen, 2007). Recently, a body of work investigated whether the factors that were shown  
587 to influence decision-making during planning could also influence target selection while the hand has  
588 already start moving. Biomechanical factors such as target positions or intensity of unexpected  
589 mechanical perturbations have been shown to influence such decisions (Kurtzer et al., 2020;  
590 Michalski et al., 2020; Nashed et al., 2014). More recently, a study revealed that cognitive factors  
591 such as reward distribution amongst the different options could also influence online decision-  
592 making (Cos et al., 2021; Marti-Marca et al., 2020). In Experiment 2, we revealed that both the  
593 reward distribution and the state of the peripheral motor systems had an effect on online decision-  
594 making confirming therefore that both sensorimotor and abstract cognitive factors influence target  
595 selection during a movement. Importantly, Experiment 3 revealed a causal link between higher  
596 muscle activities and the reduction in switching probability and additionally dismissed any causal  
597 influence of movement speed on this reduction in flexibility contrary to previous paradigms that  
598 largely modulated the movement speed (Wong & Haith, 2017).

599 Physiologically, the robust control strategy, characterized partly by higher overall muscle activity of  
600 the antagonist pair of shoulder flexor and extensor muscles, is known to recruit spinal circuits and  
601 increase the gain of stretch reflexes. It has been shown that the short-latency stretch response (20-  
602 45 ms) is affected by automatic gain scaling (Bedingham & Tatton, 1984; Marsden et al., 1976;  
603 Matthews, 1986; Pruszynski et al., 2009; Stein et al., 1995; Verrier, 1985). Automatic gain scaling is  
604 also known to affect long latency stretch responses (Pruszynski et al., 2009) while decreasing with  
605 time and had no effect on the voluntary epoch. The difference in muscle activity we observed  
606 between the switch and the no-switch trials can therefore induce a difference in the amplitudes of  
607 the short and long latency responses between both conditions. We did not measure any difference in  
608 the short-latency epochs but observed some reward-dependency in the long-latency ones that could  
609 support this hypothesis. Moreover, our results support the hypothesis that an increase in co-  
610 contraction does not only increase the intrinsic limb stiffness (Burdet et al., 2001; Hogan, 1984) but



611 that it can also modulate the robustness of the neural controller through feedback gains (Crevecoeur  
612 et al., 2019).

613 To conclude, our study highlights that multiple mechanisms underlie reward-dependent planning and  
614 control of movement. On the one hand, we suggest that there is a robust control strategy that  
615 involves peripheral circuits by means of increases in baseline activity and gain scaling of the feedback  
616 responses. This strategy associated with robust control is likely selected to reject perturbations and  
617 reduce the risk of missing the reward suggesting that there could be a cost incurred to reward. On  
618 the other hand, there exists a more flexible control strategy able to switch target during movement.  
619 It is conceivable that this second strategy, which requires some inhibition of muscle activity and  
620 response, be mediated by higher level inhibitory circuits and response modulation (Scott, 2016;  
621 Shadmehr & Krakauer, 2008). Both strategies take into account explicit target rewards and depend  
622 on the state of peripheral control loops.

623 Future work could study whether and how much individuals can modulate their strategy or whether  
624 the differences in strategy reflect individual traits. Indeed, individual differences have been shown in  
625 movement vigor (Reppert et al., 2018), and their possible effect on the modulation of feedback  
626 control is an exciting open question. Such ability is potentially central to understand planning and  
627 control in complex environments.

628

- 629 Basar, T., & Bernhard, P. (1991). H-infinity optimal control and related minimax design problems.  
630 *Birkhäuser, Boston, Massachussets.*
- 631 Bedingham, W., & Tatton, W. G. (1984). *Dependence of EMG Responses Evoked by Imposed Wrist*  
632 *Displacements on Pre-existing Activity in the Stretched Muscles. May, 272-280.*
- 633 Benjamin, D. J., & Berger, J. O. (2018). Redefine statistical significance. *Nature Human Behaviour,*  
634 *2(1), 6-10.* <https://doi.org/10.1038/s41562-017-0189-z>
- 635 Bian, T., Wolpert, D. M., & Jiang, Z. P. (2020). Model-free robust optimal feedback mechanisms of  
636 biological motor control. *Neural Computation, 32(3), 562-595.*  
637 [https://doi.org/10.1162/neco\\_a\\_01260](https://doi.org/10.1162/neco_a_01260)
- 638 Burdet, E., Osu, R., Franklin, D. W., Milner, T. E., & Kawato. (2001). The central nervous system  
639 stabilizes unstable dynamics by learning optimal impedance. *Nature, 414(6862), 446-449.*
- 640 Cisek, P. (2007). Cortical mechanisms of action selection : The affordance competition hypothesis.  
641 *Philosophical Transactions of the Royal Society B, 362(April), 1585-1599.*  
642 <https://doi.org/10.1098/rstb.2007.2054>
- 643 Cisek, P. (2012). Making decisions through a distributed consensus. *Current Opinion in Neurobiology,*  
644 *22(6), 927-936.* <https://doi.org/10.1016/j.conb.2012.05.007>
- 645 Cos, I., Bélanger, N., & Cisek, P. (2011). The influence of predicted arm biomechanics on decision  
646 making. *Journal of Neurophysiology, 105(6), 3022-3033.*  
647 [https://doi.org/10.1152/jn.00975.2010.](https://doi.org/10.1152/jn.00975.2010)
- 648 Cos, I., Pezzulo, G., & Cisek, P. (2021). Changes of mind after movement onset : A motor-state  
649 dependent decision-making process. *bioRxiv, 6.*
- 650 Crevecoeur, F., Scott, S. H., & Cluff, T. (2019). Robust Control in Human Reaching Movements : A  
651 Model-Free Strategy to Compensate for Unpredictable Disturbances. *The Journal of*  
652 *neuroscience : the official journal of the Society for Neuroscience, 39(41), 8135-8148.*  
653 <https://doi.org/10.1523/JNEUROSCI.0770-19.2019>

- 654 Esteves, P. O., Oliveira, L. A. S., Nogueira-Campos, A. A., Saunier, G., Pozzo, T., Oliveira, J. M.,  
655 Rodrigues, E. C., Volchan, E., & Vargas, C. D. (2016). Motor planning of goal-directed action is  
656 tuned by the emotional valence of the stimulus : A kinematic study. *Scientific Reports*,  
657 6(March), 1-7. <https://doi.org/10.1038/srep28780>
- 658 Gold, J. I., & Shadlen, M. N. (2007). The Neural Basis of Decision Making. *Annual Review of*  
659 *Neuroscience*, 30, 535-574. <https://doi.org/10.1146/annurev.neuro.29.051605.113038>
- 660 Haith, A. M., Reppert, T. R., & Shadmehr, R. (2012). *Evidence for Hyperbolic Temporal Discounting of*  
661 *Reward in Control of Movements*. 32(34), 11727-11736.  
662 <https://doi.org/10.1523/JNEUROSCI.0424-12.2012>
- 663 Hogan, N. (1984). Adaptive control of mechanical impedance by coactivation of antagonist muscles.  
664 *IEEE Transactions on Automatic Control*, 29(8), 681-690.
- 665 Kurtzer, I., Muraoka, T., Singh, T., Prasad, M., Chauhan, R., & Adhami, E. (2020). Reaching movements  
666 are automatically redirected to nearby options during target split. *Journal of*  
667 *Neurophysiology*, 124(4), 10313-11028.
- 668 Lowrey, C. R., Nashed, J. Y., & Scott, S. H. (2017). Rapid and flexible whole body postural responses  
669 are evoked from perturbations to the upper limb during goal-directed reaching. *Journal of*  
670 *Neurophysiology*, 117(3), 1070-1083. <https://doi.org/10.1152/jn.01004.2015>
- 671 Manohar, S. G., Chong, T. T. J., Apps, M. A. J., Batla, A., Stamelou, M., Jarman, P. R., Bhatia, K. P., &  
672 Husain, M. (2015). Reward Pays the Cost of Noise Reduction in Motor and Cognitive Control.  
673 *Current Biology*, 25(13), 1707-1716. <https://doi.org/10.1016/j.cub.2015.05.038>
- 674 Manohar, S. G., Finzi, R. D., Drew, D., & Husain, M. (2017). Distinct Motivational Effects of Contingent  
675 and Noncontingent Rewards. *Psychological Science*, 28(7), 1016-1026.  
676 <https://doi.org/10.1177/0956797617693326>
- 677 Manohar, S. G., Muhammed, K., Fallon, S. J., & Husain, M. (2019). Motivation dynamically increases  
678 noise resistance by internal feedback during movement. *Neuropsychologica*, 123, 19-29.

- 679 Marsden, C. D., Merton, P. A., & Morton, H. B. (1976). SERVO ACTION IN THE HUMAN THUMB.  
680 *Journal of Physiology*, 257(1), 1-44.
- 681 Marti-Marca, A., Deco, G., & Cos, I. (2020). Visual-reward driven changes of movement during action  
682 execution. *Scientific Reports*, 10, 15527.
- 683 Matthews, P. B. (1986). Observations on the automatic compensation of reflex gain on varying the  
684 pre-existing level of motor discharge in man. *Journal of Physiology*, 374(May), 73-90.
- 685 Michalski, J., Green, A. M., & Cisek, P. (2020). Reaching decisions during ongoing movements. *Journal*  
686 *of Neurophysiology*, 123(3), 1090-1102. <https://doi.org/10.1152/jn.00613.2019>
- 687 Morel, P., Ulbrich, P., & Gail, A. (2017). What makes a reach movement effortful ? Physical effort  
688 discounting supports common minimization principles in decision making and motor control.  
689 *PLOS Biology*, 15(6), 1-23.
- 690 Nashed, J. Y., Crevecoeur, F., & Scott, S. H. (2014). Rapid Online Selection between Multiple Motor  
691 Plans. *Journal of Neuroscience*, 34(5), 1769-1780. [https://doi.org/10.1523/JNEUROSCI.3063-](https://doi.org/10.1523/JNEUROSCI.3063-13.2014)  
692 13.2014
- 693 Pruszynski, J. A., Kurtzer, I., Lillicrap, T. P., & Scott, S. H. (2009). Temporal Evolution of “ Automatic  
694 Gain-Scaling ”. *Journal of Neurophysiology*, 102(2), 992-1003.  
695 <https://doi.org/10.1152/jn.00085.2009>.
- 696 Reppert, T. R., Rigas, I., Herzfeld, D. J., Sedaghat-nejad, E., Komogortsev, O., & Shadmehr, R. (2018).  
697 Movement vigor as a traitlike attribute of individuality. *Journal of Neurophysiology*, 120(2),  
698 741-757. <https://doi.org/10.1152/jn.00033.2018>
- 699 Sackaloo, K., Otr, L., Strouse, E., Otr, L., Rice, M. S., & Otr, L. (2014). Degree of Preference and Its  
700 Influence on Motor Control When Reaching for Most Preferred , Neutrally Preferred , and  
701 Least Preferred Candy. *OTJR: Occupation, Participation and Health*, 35(2), 81-88.  
702 <https://doi.org/10.1177/1539449214561763>
- 703 Scott, S. H. (2016). A Functional Taxonomy of Bottom-Up Sensory Feedback Processing for Motor  
704 Actions. *Trends in Neurosciences*, 39(8), 512-526. <https://doi.org/10.1016/j.tins.2016.06.001>

- 705 Shadmehr, R., Huang, H. J., & Ahmed, A. A. (2016). A Representation of Effort in Decision-Making and  
706 Motor Control. *Experimental Brain Research*, 26(14), 1929-1934.  
707 <https://doi.org/10.1016/j.cub.2016.05.065>
- 708 Shadmehr, R., Orban de Xivry, J.-J., Xu-Wilson, M., & Shih, T. (2010). Temporal Discounting of Reward  
709 and the Cost of Time in Motor Control. *Journal of Neuroscience*, 30(31), 10507-10516.  
710 <https://doi.org/10.1523/JNEUROSCI.1343-10.2010>
- 711 Shadmehr, R., & Krakauer, J. W. (2008). A computational neuroanatomy for motor control.  
712 *Experimental Brain Research*, 185(3), 359-381. <https://doi.org/10.1007/s00221-008-1280-5>
- 713 Stein, R. B., Hunter, I. W., Lafontaine, S. R., & Jones, L. A. (1995). Analysis of short-latency reflexes in  
714 human elbow flexor muscles. *Journal of Neurophysiology*, 73, 1900-1911.
- 715 Summerside, E. M., Shadmehr, R., & Ahmed, A. A. (2018). Control of Movement Vigor of reaching  
716 movements : Reward discounts the cost of effort. *Journal of Neurophysiology*, 119(6),  
717 2347-2357. <https://doi.org/10.1152/jn.00872.2017>
- 718 Todorov, E., & Jordan, M. I. (2002). Optimal feedback control as a theory of motor coordination.  
719 *Nature Neuroscience*, 5(11), 1226-1235. <https://doi.org/10.1038/nn963>
- 720 Trommershäuser, J., Maloney, L. T., & Landy, M. S. (2003). Statistical decision theory and trade-offs in  
721 the control of motor response. *Spatial Vision*, 16(3-4), 255-275.
- 722 Trommershäuser, J., Maloney, L. T., & Landy, M. S. (2008). Decision making , movement planning and  
723 statistical decision theory. *Trends in Cognitive Sciences*, 12(8), 291-297.  
724 <https://doi.org/10.1016/j.tics.2008.04.010>
- 725 Verrier, M. C. (1985). Alterations in H reflex magnitude by variations in baseline EMG excitability.  
726 *Electroencephalogram Clin Neurophysiology*, 60, 492-499.
- 727 Wong, A. L., & Haith, A. M. (2017). Motor planning flexibly optimizes performance under uncertainty  
728 about task goals. *Nature Communications*, 8, 1DUMMY.  
729 <https://doi.org/10.1038/ncomms14624>

730 Xu-Wilson, M., Zee, D. S., & Shadmehr, R. (2009). The intrinsic value of visual information affects

731 saccade velocities. *Experimental Brain Research*, 196(4), 475-481.

732 <https://doi.org/10.1007/s00221-009-1879-1>

733 Yoon, T., Geary, R. B., Ahmed, A. A., & Shadmehr, R. (2018). Control of movement vigor and decision

734 making during foraging. *PNAS*, 115(44), E10476-E10485.

735 <https://doi.org/10.1073/pnas.1812979115>

736
